# Supplementary material
Source: publisher figshare collection journal article supplement (https://tandf.figshare.com/ndownloader/files/9172435)
Supplement: Supplementary file 1 [file 9172435]

**Supplementary Information**

Plant Signaling & Behavior

Short Communication

**Enhancement of cell wall protein SRPP expression during emergent root hair development in *Arabidopsis***

**Hiroshi Uno, Natsuki Tanaka-Takada, Ryosuke Sato, and Masayoshi Maeshima**

**Supplementary Table S1.**  List of the primer sets for RT-PCR of *SRPP*, *PHT1*, *PHF1*, *At5g04960*, *RHS12*, and *TIP4;1*. Relative mRNA contents were normalized to the *TIP4;1* transcript.

| **Name** |  | **Nucleotide sequence** |
| --- | --- | --- |
| *SRPP* | Fw | 5’-AAGTCCGGTGGCAAAACTTA-3’ |
| Rv | 5’-GGAATATCGTGGCGATGAAG-3’ |
| *PHT1* | Fw | 5’-TATTGCTTTGGGTGGGAAAG-3’ |
| Rv | 5’-GGGCAGAACTCAAGTGAAGC-3’ |
| *PHF1* | Fw | 5’-GGTGACAAACTCGGACGGAA-3’ |
| Rv | 5’-AACCTGAAGAAGCAAAGGGTGG-3’ |
| *At5g04960* | Fw | 5’-GCTCATGCACAACGTCAGTT-3’ |
| Rv | 5’-GCCTTTCATAGGACGACGAG-3’ |
| *RHS12* | Fw | 5’-CGCACTAGCGATCATCACAT-3’ |
| Rv | 5’-TTTCCTCAAATCCGTGCTCT-3’ |
| *TIP4;1* | Fw | 5’-GTCGAGCTTTACGCATCCATG-3’ |
| Rv | 5’-CTCGCCAAAAACCATTTCAG-3’ |
